# Supplementary material for: Important reaction parameters in the synthesis of phenylphosphonic acid functionalized titania particles by reactive milling
Source: Royal Society of Chemistry journal article supplement (doi:10.1039/c3nj01291c), 2014-01-01
Supplement: c3nj01291c.pdf [file c3nj01291c.pdf]

## Supporting Information

# Important Reaction Parameters in the Synthesis of Phenylphosphonic Acid Functionalized Titania Particles by Reactive Milling

Annika Betke, Guido Kickelbick

Saarland University, Inorganic Chemistry, Am Markt Zeile 3, 66125 Saarbrücken, Germany.

E-Mail: guido.kickelbick@uni-saarland.de

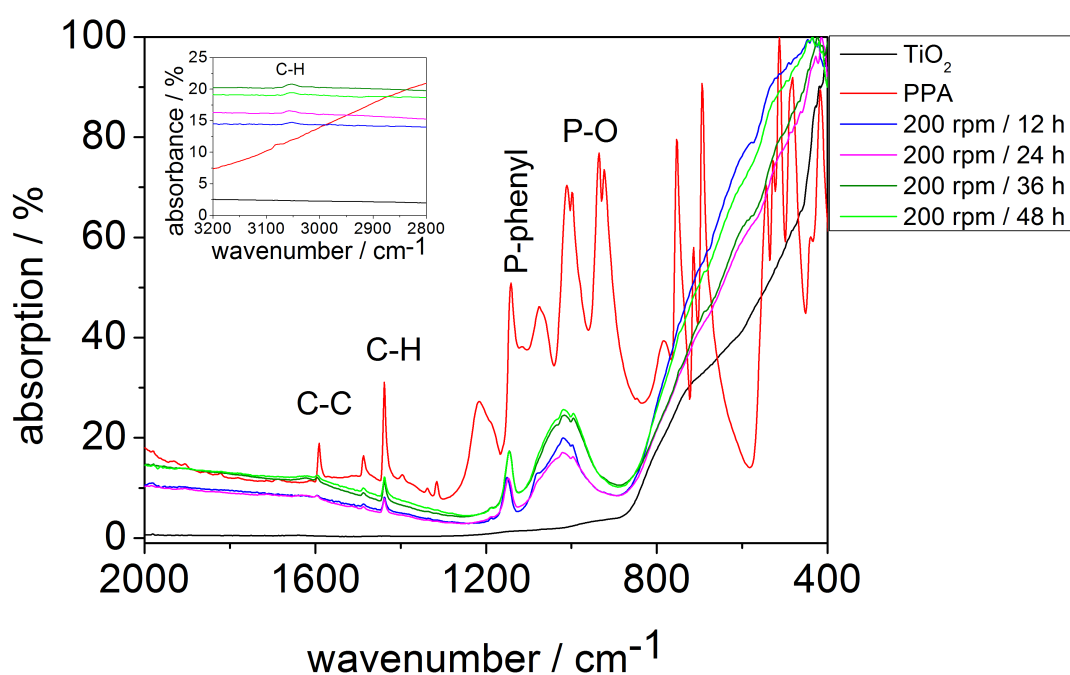

S 1: FTIR-spectra: starting material titania, coupling agent phenylphosphonic acid and samples after the milling process: 200 rpm / 12 h, 200 rpm / 24 h, 200 rpm / 36 h, 200 rpm / 48 h; surface modification has taken place after the milling process, which is indicated by the characteristic bands for aromatic C-C oscillation (1600 cm<sup>-1</sup>), the C-H oscillation (1440 cm<sup>-1</sup>), P-phenyl vibrations (1150 cm<sup>-1</sup>), the wide band at 1000 cm<sup>-1</sup> (P-O region) and the aromatic C-H oscillation at 3050 cm<sup>-1</sup>.

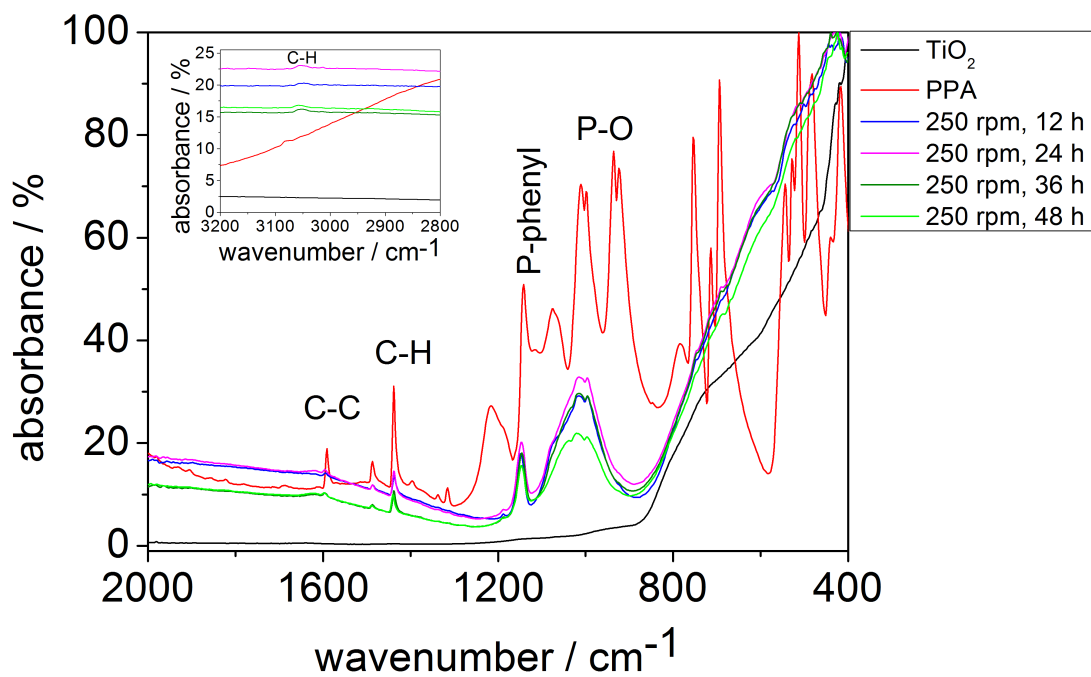

S 2: FTIR-spectra: starting material titania, coupling agent phenylphosphonic acid and samples after the milling process: 250 rpm / 12 h, 250 rpm / 24 h, 250 rpm / 36 h, 250 rpm / 48 h; surface modification has taken place after the milling process, which is indicated by the characteristic bands for aromatic C-C oscillation ( $1600 \text{ cm}^{-1}$ ), the C-H oscillation ( $1440 \text{ cm}^{-1}$ ), P-phenyl vibrations ( $1150 \text{ cm}^{-1}$ ), the wide band at  $1000 \text{ cm}^{-1}$  (P-O region) and the aromatic C-H oscillation at  $3050 \text{ cm}^{-1}$ .

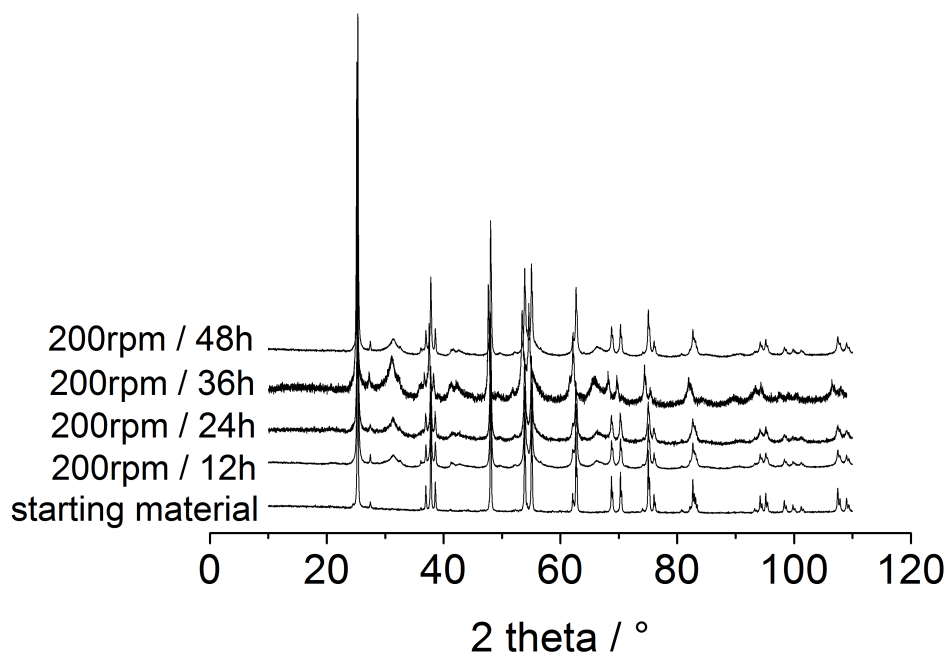

S 3: XRD patterns of the starting material anatase and the samples after milling with phenylphosphonic acid at 200 rpm with different durations. After the milling the presence of high pressure  $\text{TiO}_2$  ( $2\theta = 31^\circ, 42^\circ$  and  $66^\circ$ ) and rutile ( $2\theta = 27^\circ$ ) is indicated by additional reflections.

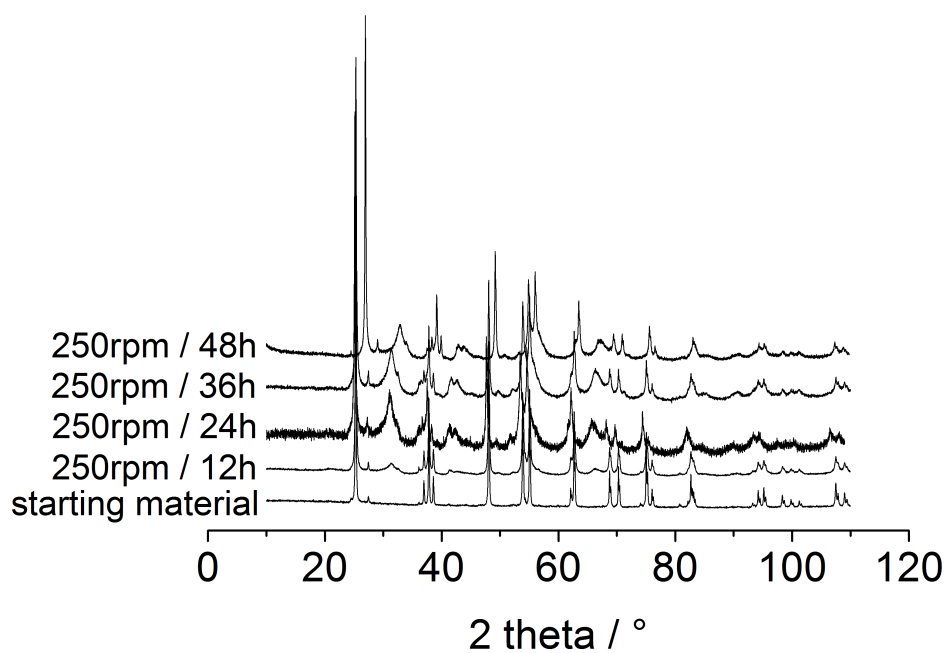

S 4: XRD patterns of the starting material anatase and the samples after milling with phenylphosphonic acid at 250 rpm with different durations. After the milling the presence of high pressure TiO<sub>2</sub> ( $2\theta = 31^\circ$ ,  $42^\circ$  and  $66^\circ$ ) and rutile ( $2\theta = 27^\circ$ ) is indicated by additional reflections.

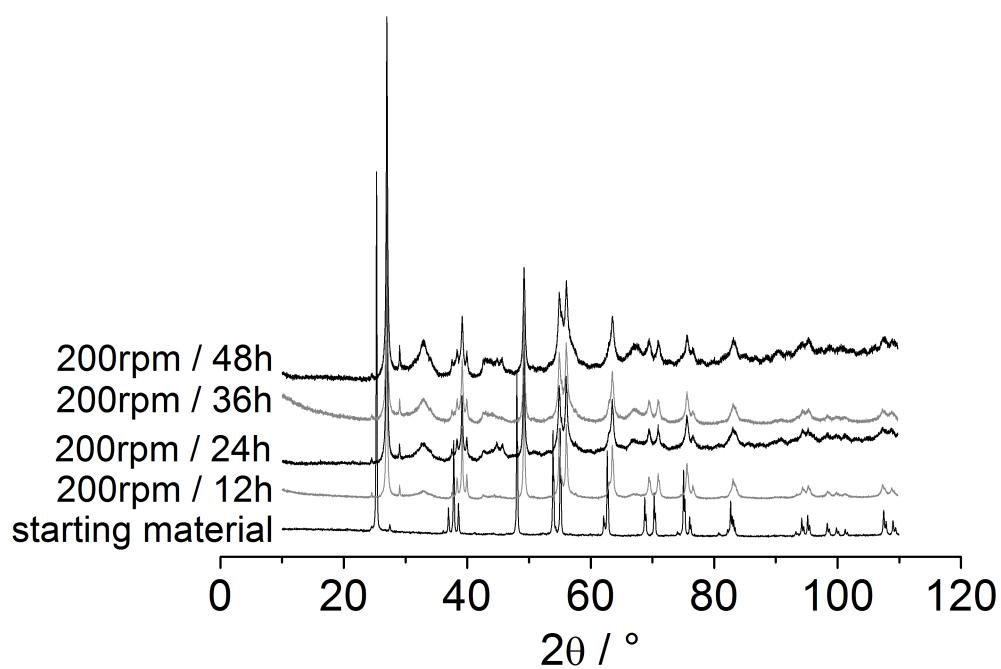

S 5: XRD patterns of the starting material anatase and the samples after milling without any additive at 200 rpm with different durations. After the milling the presence of high pressure TiO<sub>2</sub> ( $2\theta = 31^\circ$ ,  $42^\circ$  and  $66^\circ$ ) and rutile ( $2\theta = 27^\circ$ ) is indicated by additional reflections.

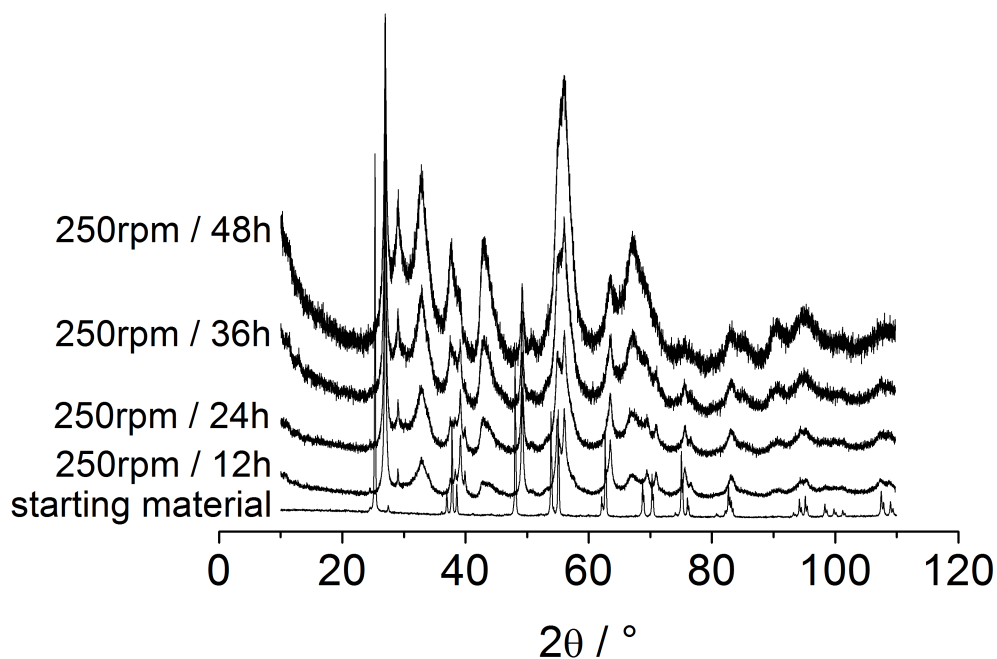

S 6: XRD patterns of the starting material anatase and the samples after milling without any additive at 250 rpm with different durations. After the milling the presence of high pressure  $\text{TiO}_2$  ( $2\theta = 31^\circ$ ,  $42^\circ$  and  $66^\circ$ ) and rutile ( $2\theta = 27^\circ$ ) is indicated by additional reflections.

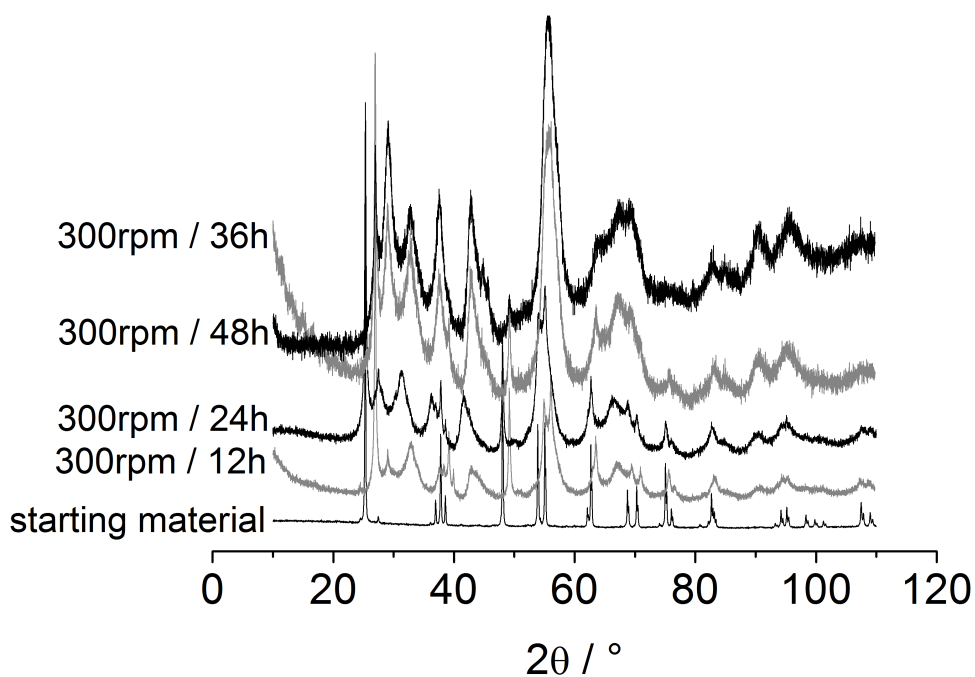

S 7: XRD patterns of the starting material anatase and the samples after milling without any additive at 300 rpm with different durations. After the milling the presence of high pressure  $\text{TiO}_2$  ( $2\theta = 31^\circ$ ,  $42^\circ$  and  $66^\circ$ ) and rutile ( $2\theta = 27^\circ$ ) is indicated by additional reflections.

Table S 1: Composition of titania milled with phenylphosphonic acid as coupling agent at specific process parameters

| Process parameters | anatase / wt%  | rutile / wt%  | high pressure / wt% |
|--------------------|----------------|---------------|---------------------|
| starting material  | $98.2 \pm 0.1$ | $1.8 \pm 0.1$ | 0                   |
| 200 rpm / 12 h     | $69.1 \pm 0.2$ | $2.9 \pm 0.1$ | $28.0 \pm 0.2$      |

|                |            |           |            |
|----------------|------------|-----------|------------|
| 200 rpm / 24 h | 64.4 ± 0.3 | 2.3 ± 0.2 | 33.3 ± 0.3 |
| 200 rpm / 36 h | 42.5 ± 0.3 | 3.8 ± 0.2 | 53.7 ± 0.3 |
| 200 rpm / 48 h | 62.4 ± 0.2 | 3.0 ± 0.1 | 34.6 ± 0.2 |
| 250 rpm / 12 h | 71.9 ± 0.2 | 2.6 ± 0.1 | 25.5 ± 0.2 |
| 250 rpm / 24 h | 36.7 ± 0.3 | 4.1 ± 0.2 | 59.2 ± 0.3 |
| 250 rpm / 36 h | 36.9 ± 0.2 | 3.9 ± 0.1 | 59.2 ± 0.2 |
| 250 rpm / 48 h | 41.2 ± 0.3 | 4.3 ± 0.2 | 54.2 ± 0.4 |
| 300 rpm / 12 h | 41.3 ± 0.2 | 4.3 ± 0.2 | 54.4 ± 0.2 |
| 300 rpm / 24 h | 18.3 ± 0.2 | 4.1 ± 0.1 | 77.6 ± 0.2 |
| 300 rpm / 36 h | 13.4 ± 0.2 | 6.0 ± 0.2 | 80.6 ± 0.3 |
| 300 rpm / 48 h | 18.3 ± 0.2 | 4.1 ± 0.1 | 77.6 ± 0.2 |

**Table S 2: Composition of titania milled without any coupling agent at specific process parameters**

| Process parameters | anatase / wt% | rutile / wt% | high pressure / wt% |
|--------------------|---------------|--------------|---------------------|
| starting material  | 98.2 ± 0.1    | 1.8 ± 0.1    | 0                   |
| 200 rpm / 12 h     | 78.1 ± 0.3    | 2.4 ± 0.1    | 19.5 ± 0.3          |
| 200 rpm / 24 h     | 51.9 ± 0.6    | 2.0 ± 0.1    | 46.1 ± 0.6          |
| 200 rpm / 36 h     | 50.1 ± 0.4    | 3.1 ± 0.1    | 46.8 ± 0.4          |
| 200 rpm / 48 h     | 37.1 ± 0.4    | 3.8 ± 0.2    | 59.1 ± 0.4          |
| 250 rpm / 12 h     | 40.7 ± 0.4    | 3.3 ± 0.2    | 56.0 ± 0.4          |
| 250 rpm / 24 h     | 23.0 ± 0.3    | 11.0 ± 0.3   | 66.0 ± 0.4          |
| 250 rpm / 36 h     | 12.4 ± 0.2    | 18.0 ± 0.5   | 69.6 ± 0.5          |
| 250 rpm / 48 h     | 6.1 ± 0.1     | 26.6 ± 0.5   | 67.3 ± 0.5          |
| 300 rpm / 12 h     | 23.6 ± 0.2    | 14.5 ± 0.4   | 61.9 ± 0.4          |
| 300 rpm / 24 h     | 14.6 ± 0.3    | 19.0 ± 0.6   | 66.4 ± 0.6          |
| 300 rpm / 36 h     | 6.4 ± 0.1     | 36.1 ± 0.5   | 57.5 ± 0.5          |
| 300 rpm / 48 h     | 2.4 ± 0.1     | 38.0 ± 0.6   | 59.6 ± 0.6          |

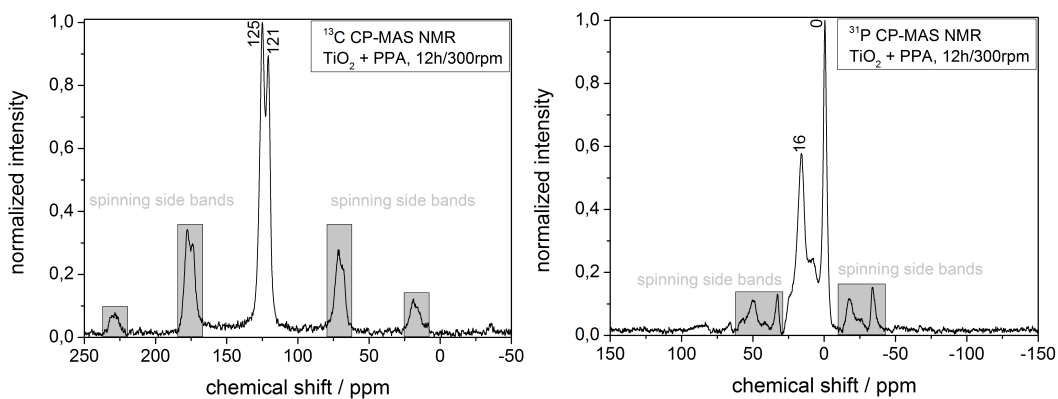

**S 8: Titania milled with phenylphosphonic acid for 12 h at 300 rpm, <sup>13</sup>C solid state NMR (left) and <sup>31</sup>P solid state NMR (right)**

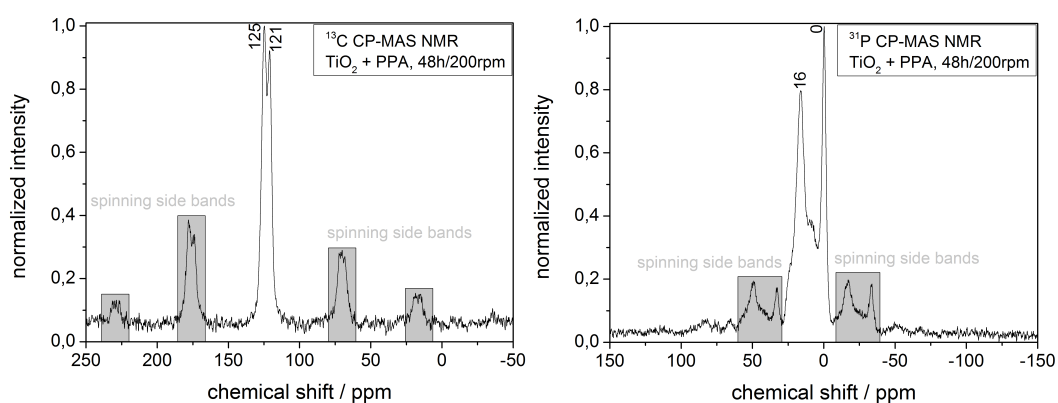

**S 9: Titania milled with phenylphosphonic acid for 48 h at 200 rpm, <sup>13</sup>C solid state NMR (left) and <sup>31</sup>P solid state NMR (right)**

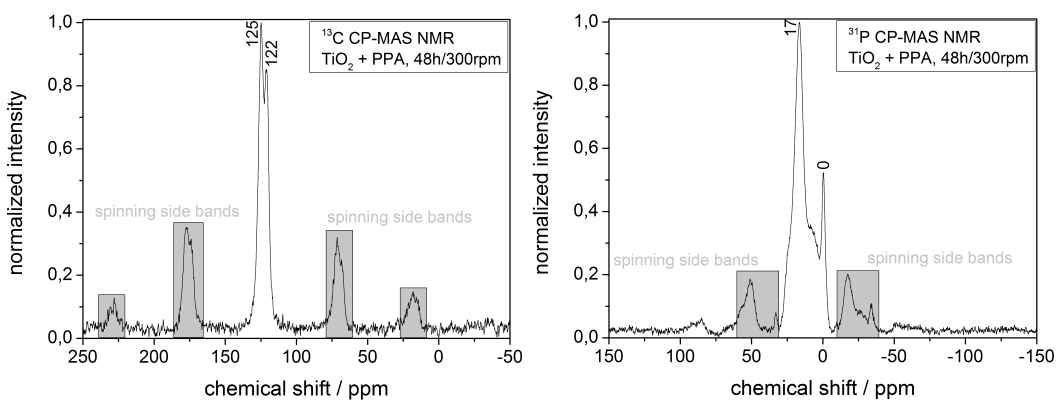

**S 10: Titania milled with phenylphosphonic acid for 48 h at 300 rpm, <sup>13</sup>C solid state NMR (left) and <sup>31</sup>P solid state NMR (right)**

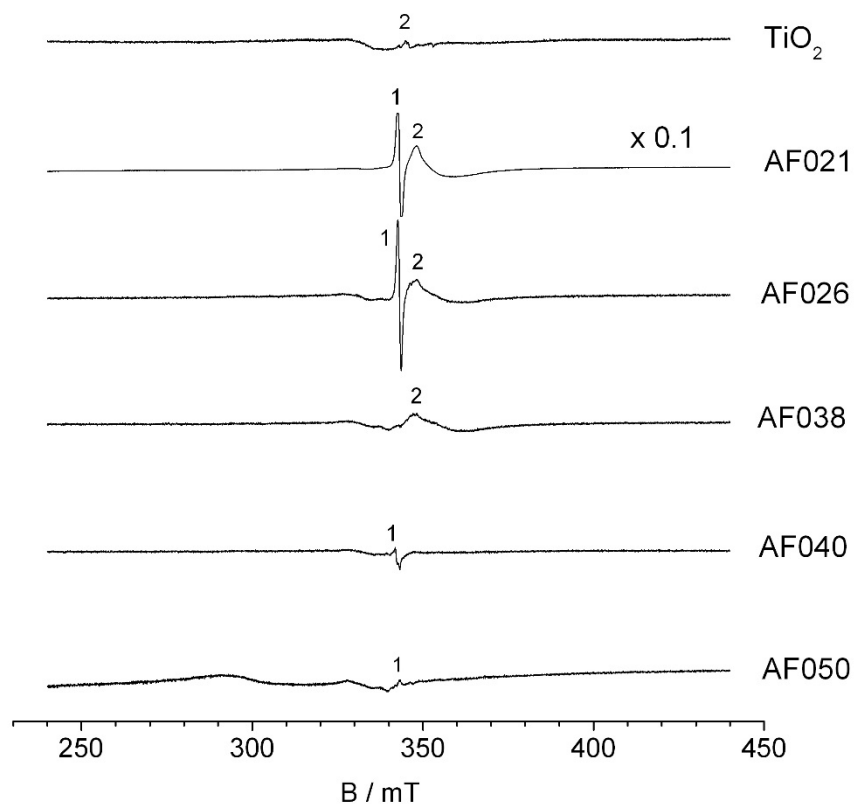

**S 11: ESR spectra of the starting material TiO<sub>2</sub> and samples after the milling process. Titania milled with phenylphosphonic acid in a WC/Co-hard metal grinding bowl (AF021) and in a zirconia grinding bowl (AF026), titania milled with dodecylphosphonic acid in a zirconia grinding bowl (AF038), titanina milled without any additive in a WC/Co-hard metal grinding bowl (AF050) and in a zirconia grinding bowl (AF040).**
